# Supplementary material for: Quantitative assessment of preoperative serum thyrotropin level and thyroid cancer
Source: PubMed Central journal article supplement (PMC5085199; doi:10.18632/oncotarget.9201), 2016-05-06
Supplement: oncotarget-07-34918-s001.pdf [file oncotarget-07-34918-s001.pdf]

# Quantitative assessment of preoperative serum thyrotropin level and thyroid cancer

## Supplementary Materials

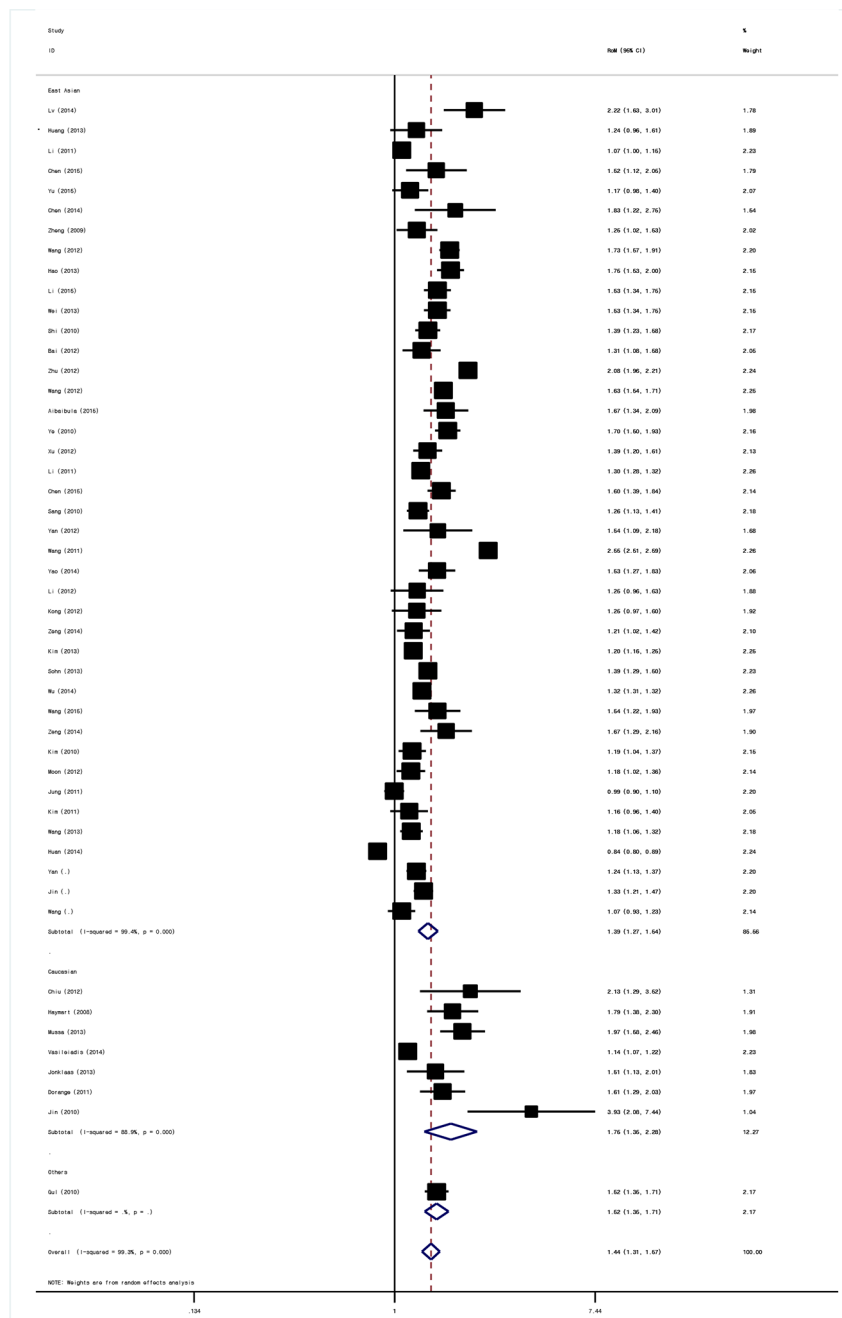

Supplementary Figure S1: Ratio of the mean (RoM) serum TSH level in the thyroid cancer group to the mean TSH level in the control group and 95% CIs without data estimation.

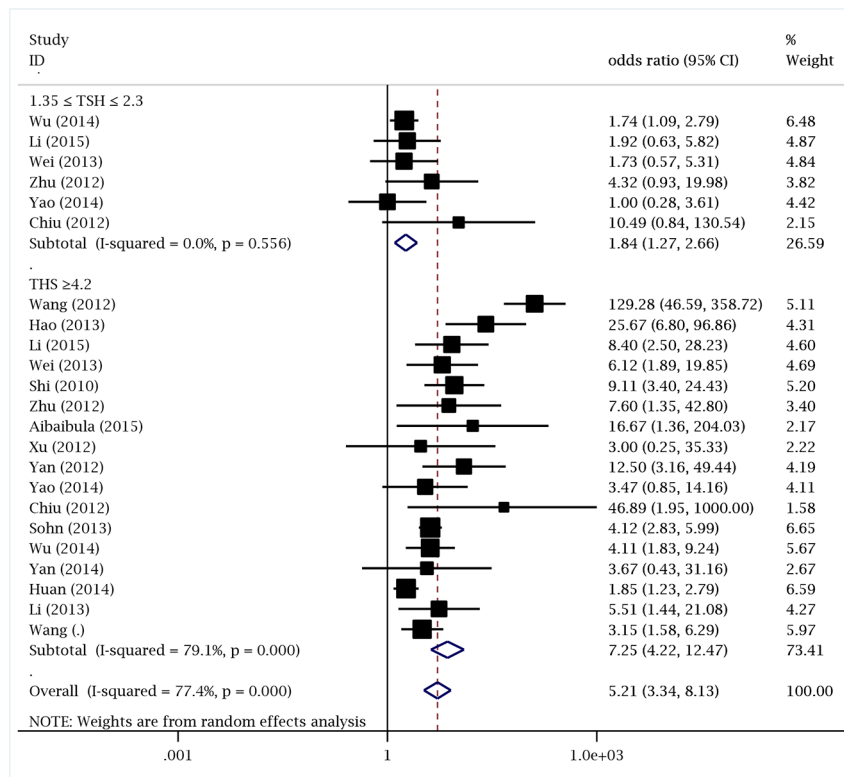

**Supplementary Figure S2: Meta-analysis with a random-effects model for the association between thyroid cancer risk and serum TSH level.**

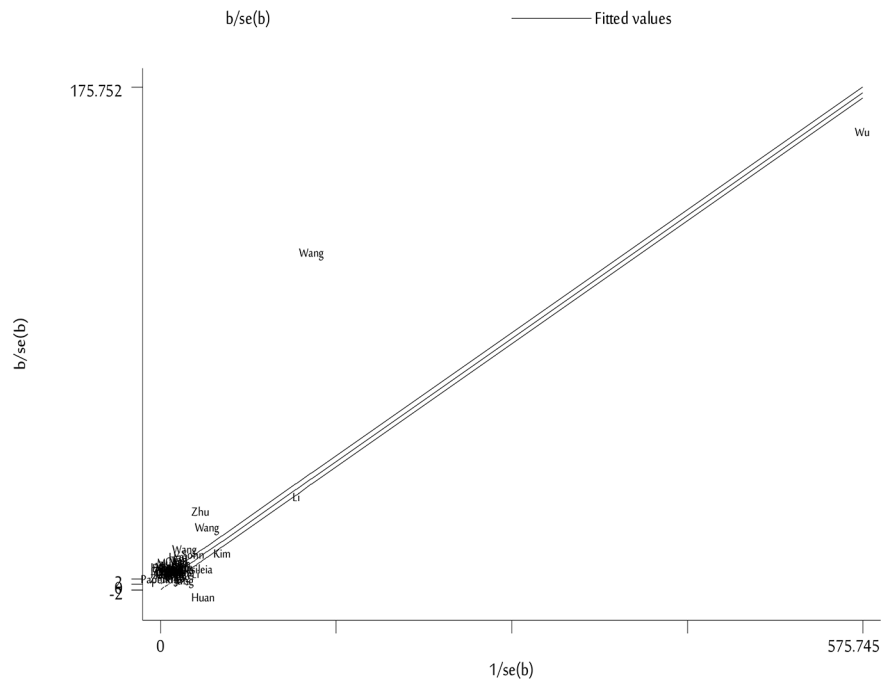

**Supplementary Figure S3: Galbraith plot for heterogeneity test of serum TSH level and thyroid cancer.**

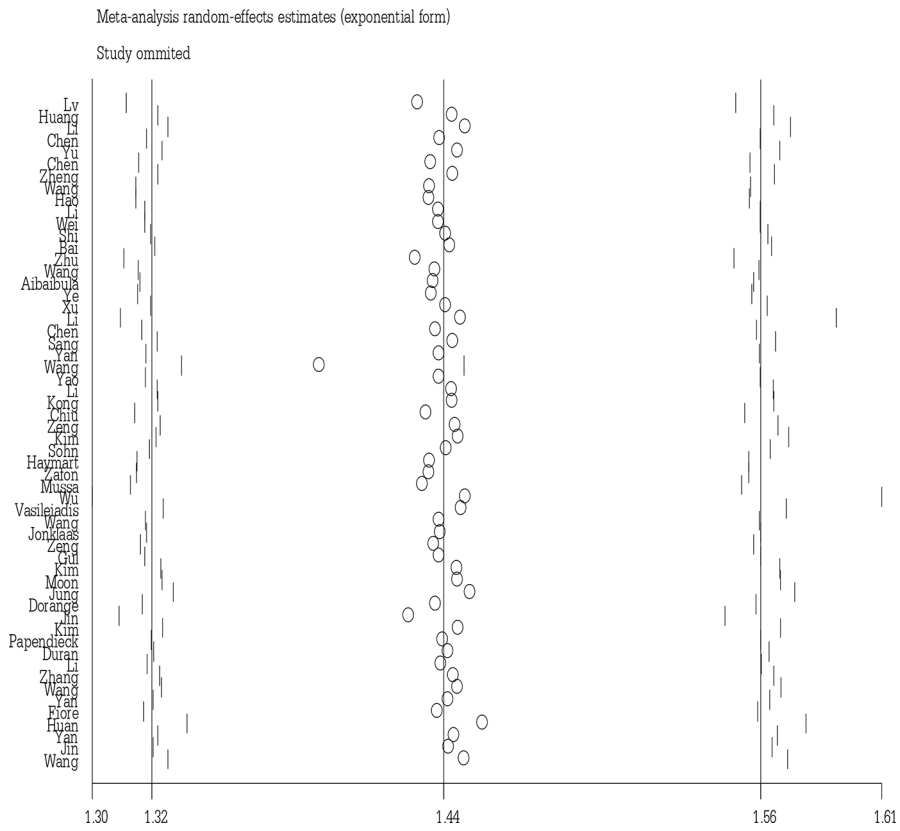

**Supplementary Figure S4: Result of sensitivity analyses for serum TSH level and thyroid cancer.**

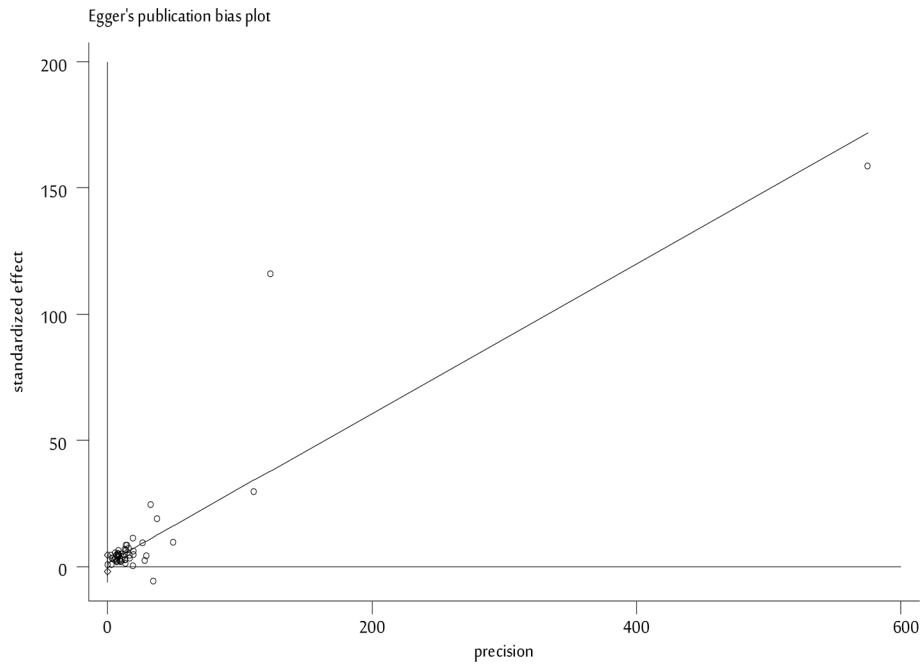

**Supplementary Figure S5: Test of small study effect on studies of serum TSH level and thyroid cancer using Egger test.**

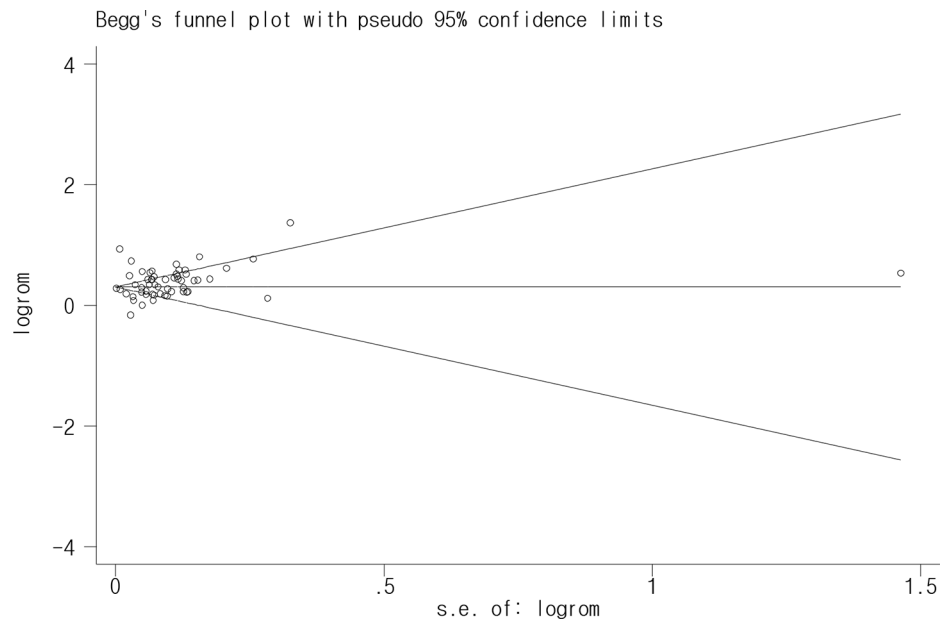

**Supplementary Figure S6: Test of small study effect on studies of serum TSH level and thyroid cancer using Begg's funnel plots.**

**Supplementary Table S1: Main characteristics of studies included in the meta-analysis. See Supplementary\_Table\_S1**
